# Supplementary material
Source: PubMed Central journal article supplement (PMC4698369)
Supplement: NIHMS545295-supplement-01.pdf [file NIHMS545295-supplement-01.pdf]

**TABLES:**

**Table e-1: Characteristics of Study Population**

| <b>CI Cohort (n=851)</b>                   |                  |                      |         |
|--------------------------------------------|------------------|----------------------|---------|
|                                            | African American | Non-African American | P-value |
| N                                          | 489              | 362                  |         |
| Mean Age, mean (SD)                        | 74.8 (7.4)       | 73.3 (6.7)           | 0.002   |
| % Female                                   | 69.9             | 67.7                 | 0.494   |
| Level of Education, mean, (SD)             | 10.2 (2.8)       | 10.4 (2.8)           | 0.310   |
| Charlson Comorbidity score, mean (SD)      | 2.9 (2.5)        | 2.8 (2.4)            | 0.696   |
| APS, mean (SD)                             | 22.1 (13.3)      | 21.9 (12.9)          | 0.847   |
| % Medicaid/Wishard Advantage               | 78.7             | 83.7                 | 0.069   |
|                                            |                  |                      |         |
| % CI, identified by SPMSQ score ≤ 8 points | 34.4             | 34.8                 | 0.891   |
| % CI, identified by ICD-9 codes            | 24.3             | 14.4                 | <0.001  |
|                                            |                  |                      |         |
|                                            |                  |                      |         |
| <b>Delirium Cohort (n=424)</b>             |                  |                      |         |
| N                                          | 247              | 177                  |         |
| Mean Age, mean (SD)                        | 78.6 (8.3)       | 75.3 (7.4)           | <0.001  |
| % Female                                   | 68.4             | 63.8                 | 0.325   |
| Level of Education, mean, (SD)             | 9.7 (2.9)        | 9.7 (2.8)            | 0.902   |
| Charlson Comorbidity score, mean (SD)      | 2.5 (2.2)        | 2.6 (2.5)            | 0.422   |
| APS, mean (SD)                             | 25.9 (14.4)      | 25.1 (13.8)          | 0.560   |
| % Medicaid/Wishard Advantage               | 77.7             | 79.1                 | 0.737   |
|                                            |                  |                      |         |
| % Delirium, identified by CAM positive     | 42.1             | 33.3                 | 0.067   |
| % Delirium, identified by ICD-9 codes      | 21.9             | 21.5                 | 0.923   |

APS: Acute  
Physiology  
Score; CI:  
Cognitive  
Impairment;  
SD: Standard  
Deviation;

SPMSQ: Short Portable Mental Status Questionnaire; CAM: Confusion Assessment Method.

**Table e-2: Association Between Race and Documentation of Cognitive Impairment (CI)**

| Clinical documentation<br>(Presence of ICD9 code)  | CI Status by SPMSQ Assessment |            |                   |             |
|----------------------------------------------------|-------------------------------|------------|-------------------|-------------|
|                                                    | Positive (n=294)              |            | Negative (n=557)  |             |
|                                                    | AA                            | Non-AA     | AA                | Non-AA      |
| Positive<br>(% of screened status)                 | 71 (42.3%)                    | 34 (27.0%) | 48 (15.0%)        | 18 (7.6%)   |
| Negative<br>(% of screened status)                 | 97 (57.7%)                    | 92 (73.0%) | 273 (85.0%)       | 218 (92.4%) |
| Unadjusted Odds Ratio<br>(95% Confidence Interval) | 1.98 (1.20-3.26)              |            | 2.13 (1.20-3.77)  |             |
| Adjusted Odds Ratio*<br>(95% Confidence Interval)  | 1.66 (0.95, 2.89)             |            | 2.10 (1.17, 3.78) |             |

Odds ratios reflect the likelihood of clinical documentation of CI in African Americans compared with non-African Americans.

AA: African Americans; non-AA: non-African Americans; CI: Cognitive Impairment; CAM: Confusion Assessment Method; ICD-9: International Classification of Disease, 9<sup>th</sup> edition

\*Multivariable model adjusting for age, gender, education, comorbidity, severity of illness, and insurance status; Reference group is non-African Americans

**Table e-3: Association Between Race and Documentation of Delirium**

| Clinical documentation<br>(presence of ICD9 code)  | Delirium Status by CAM Assessment |            |                   |            |
|----------------------------------------------------|-----------------------------------|------------|-------------------|------------|
|                                                    | Positive (n=163)                  |            | Negative (n=261)  |            |
|                                                    | AA                                | Non-AA     | AA                | Non-AA     |
| Positive<br>(% of screened status)                 | 33 (32.2%)                        | 19 (31.7%) | 21 (14.7%)        | 19 (16.1%) |
| Negative<br>(% of screened status)                 | 71 (67.8%)                        | 40 (68.3%) | 122 (85.3%)       | 99 (83.9%) |
| Unadjusted Odds Ratio<br>(95% Confidence Interval) | 0.98 (0.49, 1.94)                 |            | 0.90 (0.46, 1.76) |            |
| Adjusted Odds Ratio*<br>(95% Confidence Interval)  | 0.87 (0.42, 1.80)                 |            | 0.81 (0.39, 1.66) |            |

Odds ratios reflect the likelihood of clinical documentation of delirium in African Americans compared with non-African Americans.

AA: African Americans; non-AA: non-African Americans; CAM: Confusion Assessment Method; ICD-9: International Classification of Disease, 9<sup>th</sup> edition

\*Multivariable model adjusting for age, gender, education, comorbidity, severity of illness, and insurance status; Reference group is non-African Americans
